# Supplementary material for: Race, Interleukin‐6, TMPRSS6 Genotype, and Cardiovascular Disease in Patients With Chronic Kidney Disease
Source: PubMed Central journal article supplement — J Am Heart Assoc. 2022 Sep 14;11(18):e025627. doi: 10.1161/JAHA.122.025627 (PMC9683639; doi:10.1161/jaha.122.025627), 2022-09-14

# **SUPPLEMENTAL MATERIAL**

**Table S1. Univariable association of IL-6 quintile with outcomes. N and % of cases with the outcome are shown.**

| Outcome               | IL-6 quintile |              |              |              |              | p-value |
|-----------------------|---------------|--------------|--------------|--------------|--------------|---------|
|                       | 1<br>(n=606)  | 2<br>(n=606) | 3<br>(n=607) | 4<br>(n=606) | 5<br>(n=606) |         |
| Death                 | 79 (13%)      | 128 (21%)    | 184 (30%)    | 219 (36%)    | 293 (48%)    | <0.001  |
| CVD Composite         | 87 (15%)      | 117 (22%)    | 197 (37%)    | 227 (44%)    | 263 (55%)    | <0.001  |
| CKD Progression       | 127 (21%)     | 177 (29%)    | 203 (33%)    | 229 (38%)    | 252 (42%)    | <0.001  |
| HGB drop below normal | 145 (24%)     | 223 (37%)    | 256 (42%)    | 291 (48%)    | 334 (55%)    | <0.001  |

CVD Composite= Composite of MI, stroke, PAD, or CHF. CKD Progression= Composite of either a 50% or larger drop in eGFR from baseline or reaching ESRD. HGB decline= HGB decline over time measured using a binary indicator for having a below-normal final HGB value (<11.7 g/dL for women or <12.4 g/dL for men).

**Table S2. Univariable association of rs855791 genotype with outcomes.**

| Outcome                  | rs855791 Genotype  |                    |                   | p-value |
|--------------------------|--------------------|--------------------|-------------------|---------|
|                          | 0 (GG)<br>(n=1569) | 1 (GA)<br>(n=1122) | 2 (AA)<br>(n=340) |         |
| All-cause mortality      | 503 (32%)          | 314 (28%)          | 86 (25%)          | 0.01    |
| CVD composite            | 489 (36%)          | 319 (32%)          | 83 (28%)          | 0.007   |
| Renal composite          | 569 (36%)          | 337 (30%)          | 82 (24%)          | <0.001  |
| HGB drop below<br>normal | 710 (45%)          | 426 (38%)          | 113 (33%)         | <0.001  |

CVD composite= Composite of MI, stroke, PAD, or CHF; Renal= Composite of either a 50% or larger drop in eGFR from baseline or reaching ESRD. HGB decline= HGB decline over time measured using a binary indicator for having a below-normal final HGB value (<11.7 g/dL for women or <12.4 g/dL for men).

**Table S3. Multivariable Cox proportional hazard model that adjusted for genotype only and a model that adjusted for pooled cohort equation 10-year CVD risk, education, UACR, eGFR, population stratification, and if necessary, for non-proportionality.**

| <b>Genotype</b>        | <b>HR (95% CI)</b><br>Adjusted for IL-6<br>and genotype | <b>p-value</b> | <b>HR (95% CI)</b><br>Adjusted for all<br>covariates | <b>p-value</b> |
|------------------------|---------------------------------------------------------|----------------|------------------------------------------------------|----------------|
| <i>Death</i>           |                                                         |                |                                                      |                |
| GG                     | Reference                                               |                | Reference                                            |                |
| AG                     | 0.90 (0.78-1.03)                                        | 0.12           | 1.03 (0.89-1.19)                                     | 0.7            |
| AA                     | 0.83 (0.66-1.04)                                        | 0.11           | 1.03 (0.81-1.30)                                     | 0.82           |
| <i>CVD Composite</i>   |                                                         |                |                                                      |                |
| GG                     | Reference                                               |                | Reference                                            |                |
| AG                     | 0.88 (0.77-1.02)                                        | 0.08           | 1.01 (0.87-1.16)                                     | 0.92           |
| AA                     | 0.76 (0.60-0.96)                                        | 0.02           | 1.00 (0.79-1.27)                                     | 0.99           |
| <i>CKD Progression</i> |                                                         |                |                                                      |                |
| GG                     | Reference                                               |                | Reference                                            |                |
| AG                     | 0.79 (0.69-0.90)                                        | <0.001         | 0.85 (0.74-0.97)                                     | 0.02           |
| AA                     | 0.62 (0.49-0.78)                                        | <0.001         | 0.69 (0.54-0.87)                                     | 0.002          |
| <i>HGB Decline</i>     |                                                         |                |                                                      |                |
| GG                     | Reference                                               |                | Reference                                            |                |
| AG                     | 0.87 (0.77-0.98)                                        | 0.022          | 0.96 (0.85-1.08)                                     | 0.47           |
| AA                     | 0.79 (0.65-0.97)                                        | 0.023          | 0.95 (0.78-1.17)                                     | 0.64           |

**Figure S1.** Cumulative hazard functions for each outcome, stratified by IL-6. These are unadjusted HRs. a) Mortality, b) CVD composite, c) CKD progression, d) hemoglobin decline

**A. Mortality:** HR 1.44 (1.37-1.52),  $p < 0.001$  per quintile increase

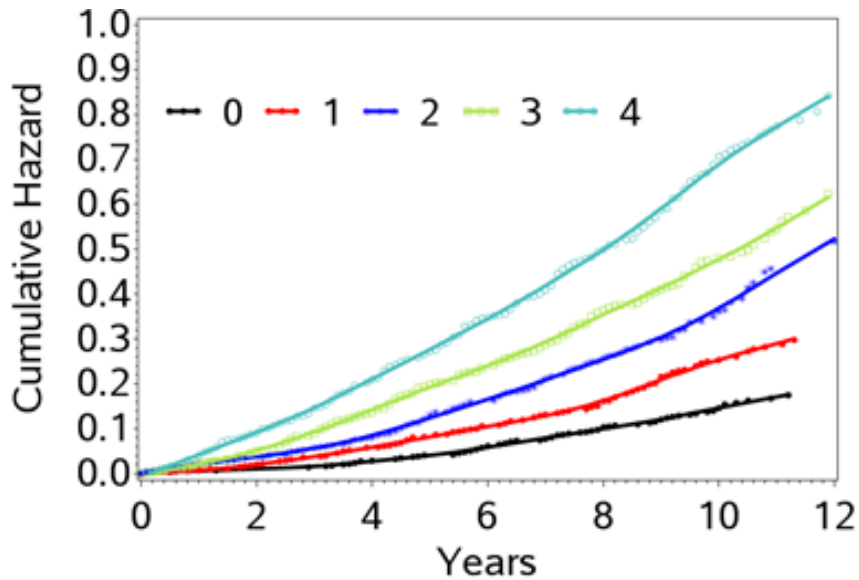

**B. CVD composite:** HR 1.48 (1.41-1.56),  $p < 0.001$  per quintile increase

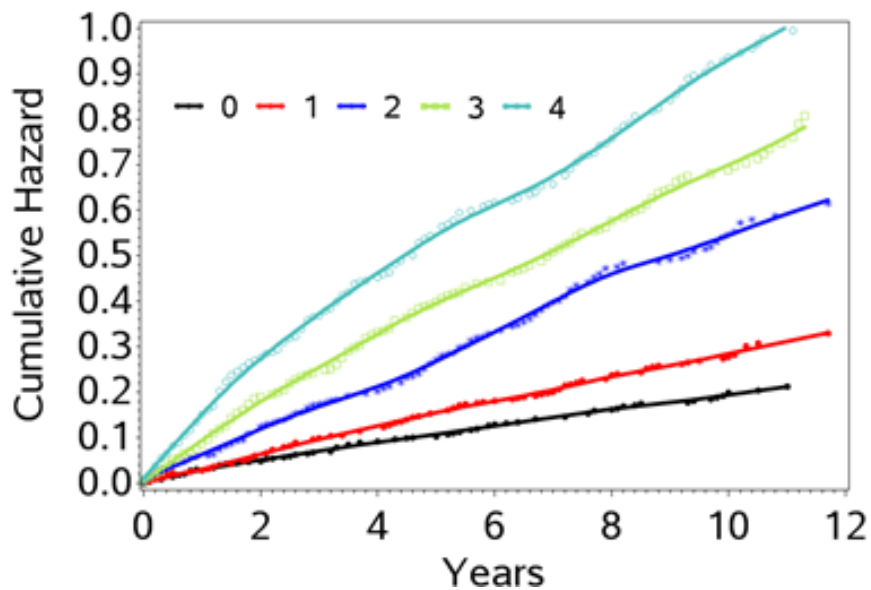

**C. CKD Progression:** HR 1.29 (1.23-1.35),  $p < .0001$ , per quintile increase

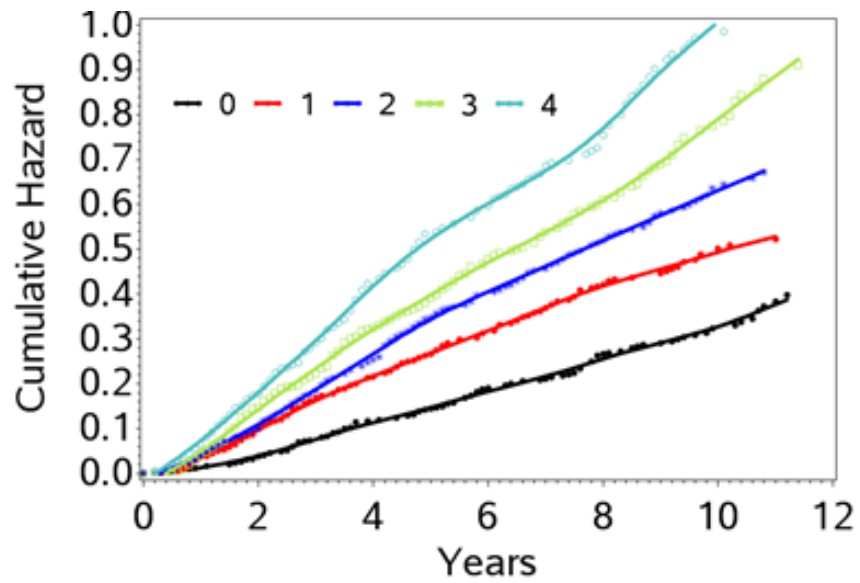

**D. HGB decline:** HR 1.32 (1.26-1.37)  $p < .0001$ , per quintile increase

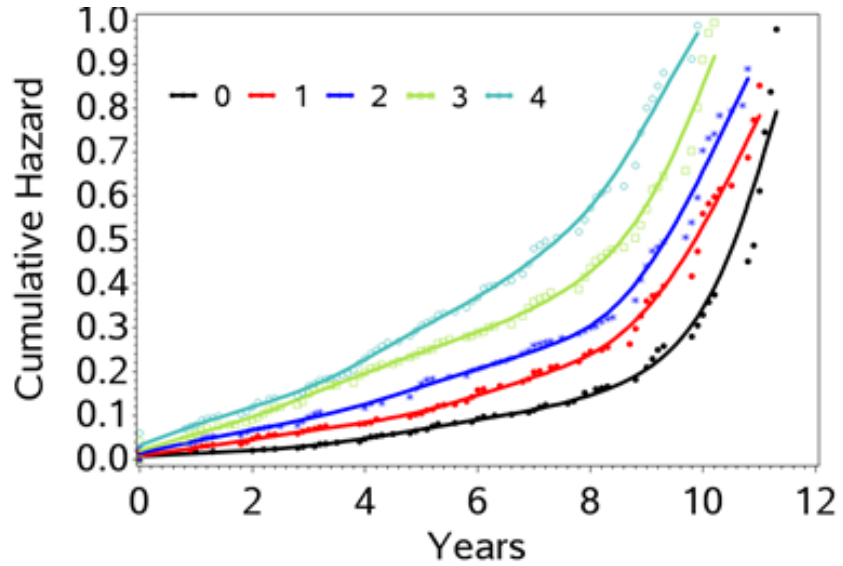

**Figure S2.** Cumulative hazard functions for each outcome, stratified by genotype only. These are unadjusted HRs. a) Mortality, b) CVD composite, c) CKD progression, d) hemoglobin decline

**A. Mortality:** AG vs GG HR 0.89 (0.78-1.03),  $p=0.12$ ; AA vs GG HR 0.83 (0.66-1.04),  $p=0.11$

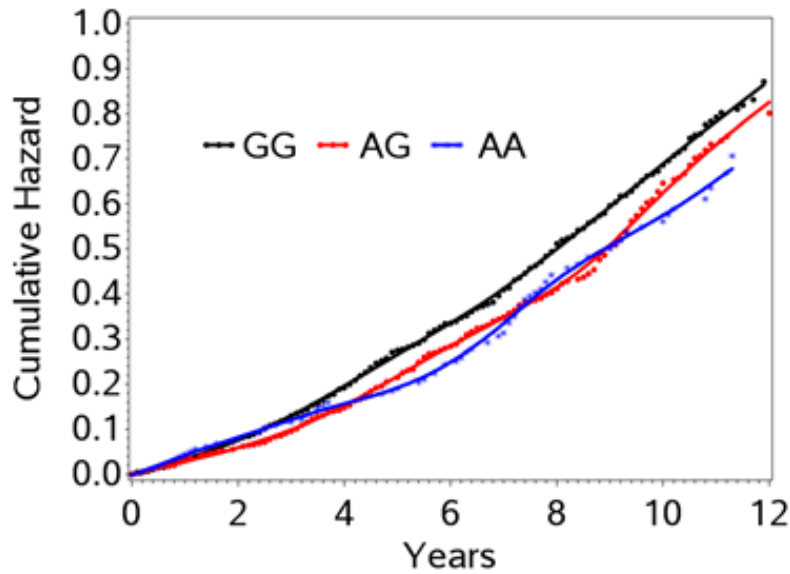

**B. CVD composite:** AG vs GG HR 0.88 (0.77-1.01),  $p=0.08$ ; AA vs GG HR 0.76 (0.60-0.96),  $p=0.03$

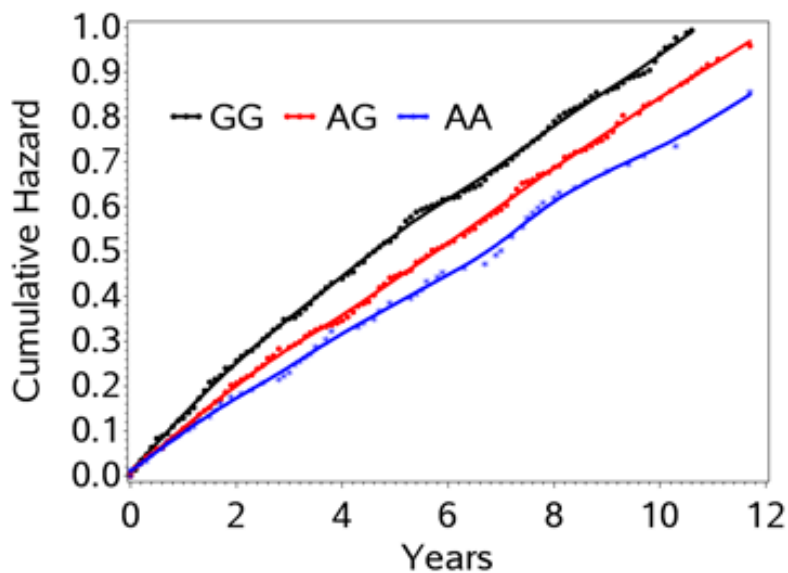

**C. CKD Progression:** AG vs GG HR 0.79 (0.69-0.90),  $p < 0.001$ ; AA vs GG HR 0.62 (0.49-0.78),  $p < 0.001$

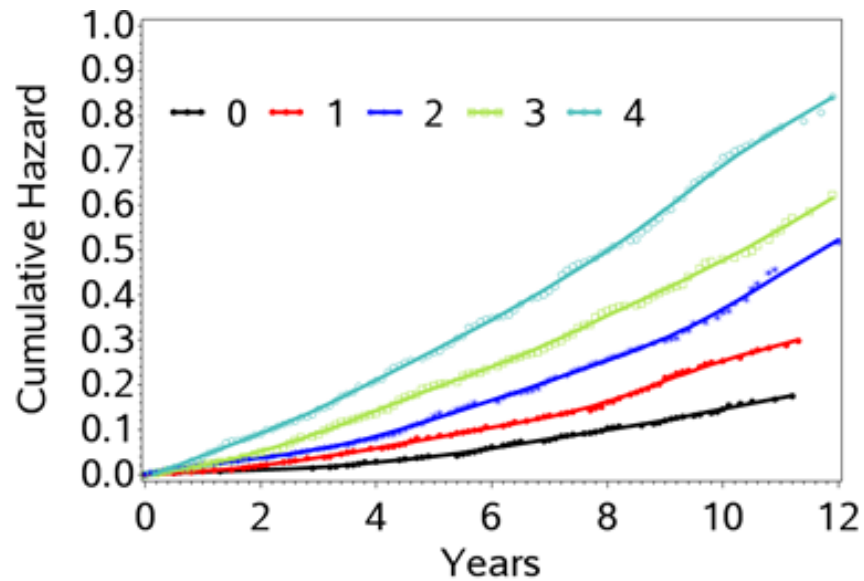

**D. HGB decline:** AG vs GG HR 0.87 (0.77-0.98),  $p = 0.022$ ; AA vs GG HR 0.79 (0.65-0.97),  $p = 0.023$

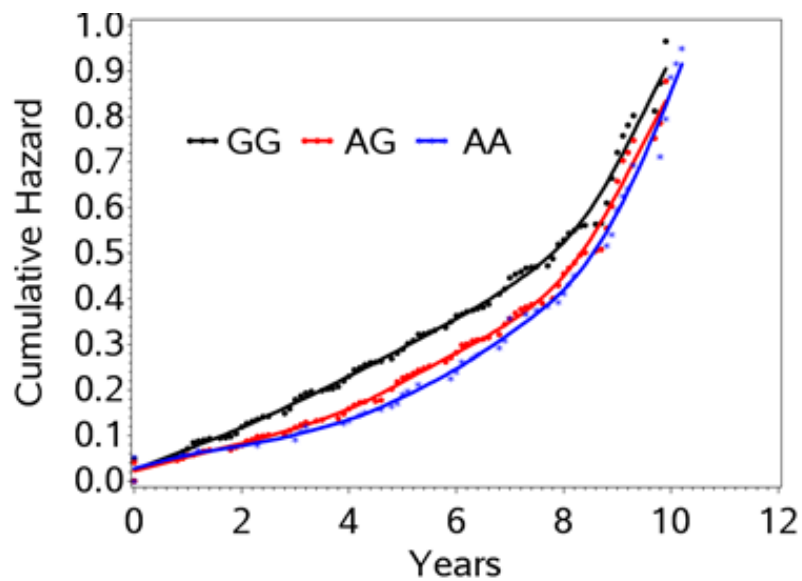

Supplement: JAH3-11-e025627-s001.pdf [file JAH3-11-e025627-s001.pdf]
